# Supplementary material for: Municipal resources and patient outcomes through the first year after a hip fracture
Source: Springer Nature journal article supplement (doi:10.1186/s12913-017-2087-5), 2017-02-16

**Additional file 1**

**Health-related quality of life (EQ-5D-3L); patient share with poorest outcomes**

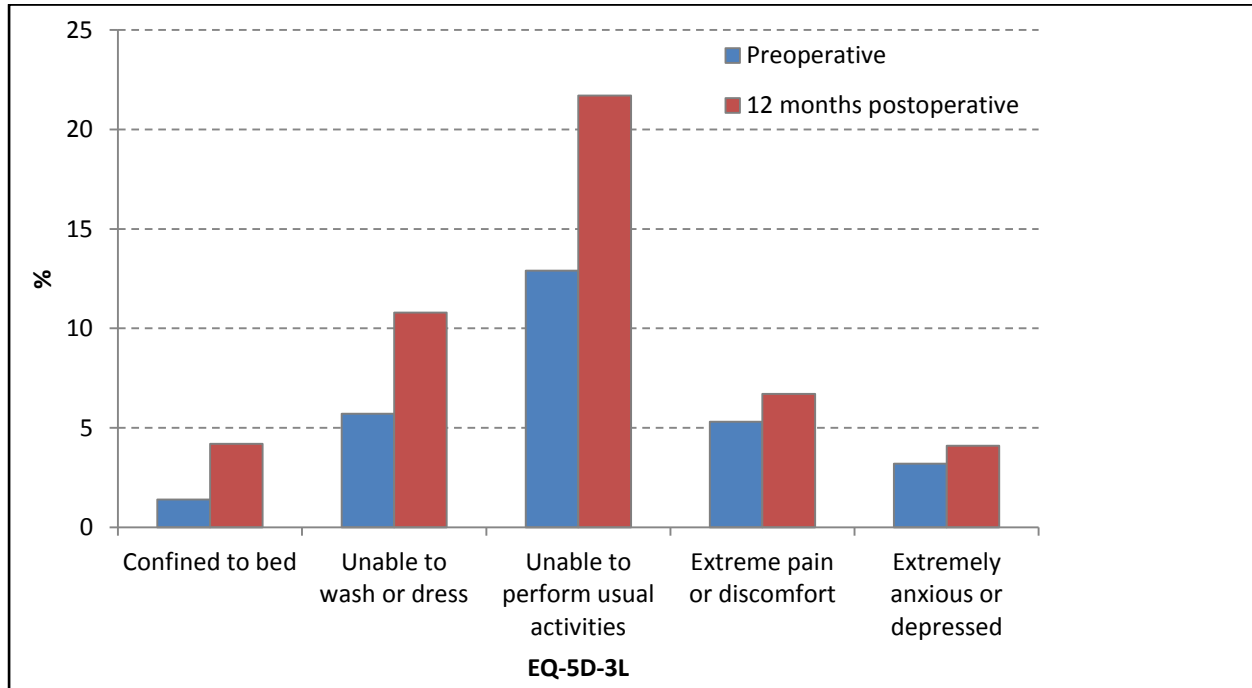

Supplement: MOESM1 [file 12072022]
